# Supplementary material for: Proteinase release from activated neutrophils in mechanically ventilated patients with non-COVID-19 and COVID-19 pneumonia
Source: PubMed Central journal article supplement — Eur Respir J. 2021 Apr 29;57(4):2003755. doi: 10.1183/13993003.03755-2020 (PMC8082325; doi:10.1183/13993003.03755-2020), 2021-04-29
Supplement: ERJ-03755-2020.Shareable.pdf [file ERJ-03755-2020.Shareable.pdf]

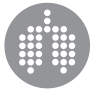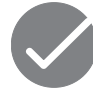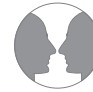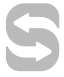

SHAREABLE PDF

# Proteinase release from activated neutrophils in mechanically ventilated patients with non-COVID-19 and COVID-19 pneumonia

Seda Seren<sup>1</sup>, Lohann Derian<sup>1,7</sup>, Irem Keleş<sup>1,2,7</sup>, Antoine Guillon<sup>1,3</sup>, Adam Lesner<sup>4</sup>, Loïc Gonzalez <sup>1</sup>, Thomas Baranek<sup>1</sup>, Mustapha Si-Tahar<sup>1</sup>, Sylvain Marchand-Adam<sup>1,5</sup>, Dieter E. Jenne<sup>6</sup>, Christophe Paget<sup>1</sup>, Youenn Jouan <sup>1,3</sup> and Brice Korkmaz <sup>1</sup>

**Affiliations:** <sup>1</sup>INSERM UMR-1100, "Research Center for Respiratory Diseases", University of Tours, Tours, France. <sup>2</sup>Yeditepe University, Istanbul, Turkey. <sup>3</sup>Intensive Care Unit, Tours University Hospital, Tours, France. <sup>4</sup>Faculty of Chemistry, University of Gdansk, Gdansk, Poland. <sup>5</sup>Dept of Pneumology and Respiratory Functional Exploration, Tours University Hospital, Tours, France. <sup>6</sup>Comprehensive Pneumology Center, Institute of Lung Biology and Disease, German Center for Lung Research (DZL) 81377 Munich and Max Planck Institute of Neurobiology, Planegg-Martinsried, Germany. <sup>7</sup>Equal contribution.

**Correspondence:** Brice Korkmaz, INSERM UMR-1100 "Research Center for Respiratory Diseases", University of Tours, Faculty of Medicine, 10 Bld. Tonnellé, 37032, Tours, France. E-mail: brice.korkmaz@inserm.fr

 @ERSpublications

**COVID-19 ARDS is associated with release of biologically active neutrophil elastase-related proteinases to the airways and blood at a comparable level to non-COVID ARDS** <https://bit.ly/3nihveh>

**Cite this article as:** Seren S, Derian L, Keleş I, *et al.* Proteinase release from activated neutrophils in mechanically ventilated patients with non-COVID-19 and COVID-19 pneumonia. *Eur Respir J* 2021; 57: 2003755 [<https://doi.org/10.1183/13993003.03755-2020>].

This single-page version can be shared freely online.

## To the Editor:

Severe cases of pneumonia are frequently associated with acute respiratory distress syndrome (ARDS), which carries a mortality rate of about 40% [1]. Uncontrolled host inflammatory response in the lung is a key factor in the transition from pneumonia to ARDS, with alveolocapillary membrane disruption leading to interstitial and alveolar oedema [2]. Neutrophils are part of the innate immune system and are the first responders to local tissue damage and infection. Recruited neutrophils are considered important actors in lung tissue injury [3]. Indeed, their broad arsenal of antimicrobial weaponry can cause direct and indirect collateral damage. Neutrophil serine proteinases (NSPs), including elastase (NE), proteinase 3 (PR3) and cathepsin G (CatG), are released from activated cells and play a part in ARDS pathophysiology, as illustrated in both preclinical and clinical studies [4]. Thus, NSPs emerge as an untapped point for therapeutic interventions in pneumonia-induced ARDS [4]. These NSPs are readily synthesised in neutrophil precursors within the bone marrow and are converted into their active form by cathepsin C (CatC) [5]. They are stored together in cytoplasmic granules and secreted into the extracellular compartment upon stimulation [6].
